# Supplementary material for: Synthesis and structural characterization of Group 4 metallocene complexes that contain remote carboxamide functionalities at their Cp-side chains
Source: Royal Society of Chemistry journal article supplement (doi:10.1039/b106026k), 2002-01-01
Supplement: b106026k.doc [file b106026k.doc]

**4-Oxo-pentanoic acid diethylamide 7b.** A solution of levulinic acid (50.0 g, 431 mmol) and diethylamine (50.0 g, 684 mmol) was heated in an autoclave at 180 °C for two days. The reaction mixture was extracted with diethyl ether (3100 mL). The combined organic phases were dried with magnesium sulfate and fractionated by vacuum distillation to yield 44.2 g (59%) of compound **7b** as a brown liquid (Found: C, 63.25; H, 10.18; N, 8.13%. C9H17NO2 requires C, 63.12; H, 10.01; N, 8.18%). / cm-1 (NaCl) 3191, 2978, 2932, 1723, 1654, 1556, 1441, 1371, 1314, 1279, 1227, 1176, 1147, 1078, 1026 and 807. H **(**[D]chloroform, 298 K, 300 MHz) 3.14 (q, 3*J* = 7.1 Hz, 4H, NCH2CH3), 2.57 (m, 2H, 3-H), 2.37 (m, 2H, 2-H), 1.96 (s, 3H, 5-H), 1.00, 0.88 (each t, each 3*J* = 7.1 Hz, each 3H, NCH2CH3). C **(**[D]chloroform, 298 K, 75.5 MHz) 208.1 (C, C-4), 170.9 (C, C-1), 42.1, 40.5 (each CH2, NCH2CH3), 38.5 (CH2, C-3), 30.3 (CH2, C-2), 27.3 (CH3, C-5), 14.4, 13.3 (each CH3, NCH2CH3).

**4-(Cyclopenta-2’,4’-dienylidene)pentanoic acid diethylamide** **8b.** Reaction of 25.0 g (146 mmol) of compound **7b** with 27.6 mL (23.2 g, 350 mmol) of freshly distilled cyclopentadiene and 56.6 mL (51.2 g, 720 mmol) pyrrolidine carried out as described above gave after column chromatography on silica gel 60 (diethyl ether:ethanol = 95:5, Rf = 0.87) 22.4 g (82%) of the pentafulvene **8b** as a yellow oil (Found: C, 76.68; H, 10.01; N, 6.44%. C14H21NO requires C, 76.67; H, 9.65; N, 6.39%). / cm-1 (NaCl) 3115, 3073, 2984, 2931, 1645, 1562, 1461, 1437, 1372, 1265, 1224, 1147, 1088, 874, 773 and 625. H (chloroform-*d*, 298 K, 600 MHz) 6.47 (m, 4H, Fulv.-H), 3.36, 3.25 (each q, each 3*J* = 7.1 Hz,each 2H, NCH2CH3), 2.86 (m, 2H, 3-H), 2.50 (m, 2H, 2-H), 2.21 (s, 3H, 5-H), 1.13, 1.10 (each t, each 3*J* = 7.1 Hz, each 3H, NCH2CH3). C (chloroform-*d*, 298 K, 150.8 MHz) 170.6 (C, C-1), 152.4 (C, C-4), 143.0 (C, C-1’), 131.2, 120.2 (each CH, C-3’, C-4’), 131.1, 120.6 (each CH, C-2’, C-5’), 41.9, 40.3 (each CH2, NCH2CH3), 32.9 (CH2, C-2), 32.4 (CH2, C-3), 21.0 (CH3, C-5), 14.3, 13.0 (each CH3, NCH2CH3).

**4-(Cyclopenta-2’,4’-dienylidene)pentanoic acid tetramethyleneamide 8c.** Reaction of 20.0 g (154 mmol) of 4-oxo-pentanoic acid methylester with 34.0 mL (28.5 g, 431 mmol) freshly distilled cyclopentadiene and 60.0 mL (54.3 g, 763 mmol) pyrrolidine as described above gave after column chromatography on silica gel 60 (diethyl ether:ethanol = 95:5, Rf = 0.52) 19.3 g (58%) of the pentafulvene **8c** as a yellow oil (Found: C, 77.21; H, 9.35; N, 6.51%. C14H19NO requires C, 77.38; H, 8.81; N, 6.45%). / cm-1 (NaCl) 3105, 3105, 3070, 2963, 2892, 1650, 1444, 1373, 1202, 869 and 776. H (chloroform-*d*, 298 K, 600 MHz) 6.46 (m, 4H, Fulv.-H), 3.44, 3.34 (each m, each 2H, -H), 2.86 (m, 2H, 3-H), 2.46 (m, 2H, 2-H), 2.21 (s, 3H, 5-H), 1.91, 1.82 (each m, each 2H, -H). C (chloroform-*d*, 298 K, 150.8 MHz) 170.2 (C, C-1), 152.2 (C, C-4), 143.0 (C, C-1’), 131.2, 120.6 (each CH, C-3’, C-4’), 131.0, 120.3 (each CH, C-2’, C-5’), 46.6, 45.8 (each CH2, C-), 34.5 (CH2, C-2), 32.0 (CH2, C-3), 26.1, 24.3 (each CH2, C-), 21.0 (CH3, C-5).

4-1-(Cyclopenta-1,3-dienyl)-4-methyl-pentanoic acid diethylamide 9b-A/4-2-(cyclopenta-1,3-dienyl)-4-methyl-pentanoic acid diethylamide 9b-B. Reaction of 4.50 g (20.5 mmol) of compound 8b with a dimethylcuprate solution (from 8.40 g, 43.1 mmol copper(I)iodide and 47.1 mL, 86.2 mmol, of a 1.83 M ethereal methyllithium solution) carried out as described above gave 3.30 g (69%) of the 9b-A/9b-B (1.8:1) mixture of isomers, (Found: C, 76.55; H, 10.76; N, 6.20%. C15H25NO requires C, 76.55; H, 10.71; N, 5.95%). / cm-1 (NaCl) 3066, 2968, 2932, 2870, 1646, 1455, 1429, 1378, 1218, 1135 and 898. H (chloroform-*d*, 298 K, 600 MHz, 9b-A) 6.54, 6.40, 5.96 (each m, each 1H, Cp-H), 3.30, 3.14 (each q, each 3*J* = 7.0 Hz, each 2H, NCH2CH3), 2.92 (m, 2H, Cp-H), 2.06 (m, 2H, 2-H), 1.79 (m, 2H, 3-H), 1.15 (s, 6H, 5-/5’-H), 1.04, 1.03 (each m, each 3H, NCH2CH3). C (chloroform-*d*, 298 K, 150.8 MHz, 9b-A) 172.7 (C, C-1), 154.5 (C, Cp), 133.9, 132.4, 124.5 (each CH, Cp), 41.8, 40.0 (each CH2, NCH2CH3), 41.0 (CH2, Cp), 37.5 (CH2, C-3), 34.9 (C, C-4), 28.9 (CH2, C-2), 27.4 (CH3, C-5/-5’), 14.2, 13.1 (each CH3, NCH2CH3). H (chloroform-*d*, 298 K, 600 MHz, 9b-B) 6.37, 6.24, 6.14 (each m, each 1H, Cp-H), 3.30, 3.17 (each q, each 3*J* = 7.0 Hz, each 2H, NCH2CH3), 2.89 (m, 2H, Cp-H), 2.06 (m, 2H, 2-H), 1.79 (m, 2H, 3-H), 1.15 (s, 6H, 5-/5’-H), 1.04, 1.03 (each m, each 3H, NCH2CH3). C (chloroform-*d*, 298 K, 150.8 MHz, 9b-B) 172.5 (C, C-1), 157.1 (C, Cp), 131.7, 131.0, 125.6 (each CH, Cp), 41.8, 40.1 (each CH2, NCH2CH3), 40.2 (CH2, Cp), 38.7 (CH2, C-3), 36.0 (C, C-4), 28.7 (CH2, C-2), 28.5 (CH3, C-5/-5’), 14.3, 13.1 (each CH3, NCH2CH3).

4-1-(Cyclopenta-1,3-dienyl)-4-methyl-pentanoic acid tetramethylenamide 9c-A/4-2-(cyclopenta-1,3-dienyl)-4-methyl-pentanoic acid tetramethylenamide 9c-B. Reaction of 13.5 g (62.2 mmol) of compound 8c with a dimethylcuprate solution (from 25.4 g, 133 mmol copper(I)iodide and 145 mL, 266 mmol, of a 1.83 M ethereal methyllithium solution) carried out as described above gave 6.60 g (45%) of the 9c-A/9c-B (1.6:1) mixture of isomers, (Found: C, 78.08; H, 9.49; N, 6.04%. C15H23NO requires C, 77.21; H, 9.93; N, 6.00%). / cm-1 (NaCl) 3068, 2979, 2857, 1639, 1441 , 1380, 1339, 1258, 1115, 979, 897, 761 and 686. H (chloroform-*d*, 298 K, 600 MHz, 9c-A) 6.55, 6.41, 5.98 (each m, each 1H, Cp-H), 3.41 (m, 4H, -H), 2.94 (m, 2H, Cp-H), 2.07 (m, 2H, 2-H), 1.83 (m, 2H, 3-H), 1.81 (m, 4H, -H), 1.16 (s, 6H, 5-/5’-H). C (chloroform-*d*, 298 K, 150.8 MHz, 9c-A) 172.2 (C, C-1), 154.5 (C, Cp), 133.8, 132.4, 124.4 (CH, Cp), 45.6 (CH2, C-), 41.0 (CH2, Cp), 36.9 (CH2, C-3), 34.9 (C, C-4), 30.5 (CH2, C-2), 27.4 (CH3, C-5/-5’), 24.3 (CH2, C-). H (chloroform-*d*, 298 K, 600 MHz, 9c-B) 6.38, 6.26, 6.16 (each m, each 1H, Cp-H), 3.29 (m, 4H, -H), 2.90 (m, 2H, Cp-H), 2.07 (m, 2H, 2-H), 1.89 (m, 4H, -H), 1.83 (m, 2H, 3-H), 1.17 (s, 6H, 5-/5’-H). C (chloroform-*d*, 298 K, 150.8 MHz, 9c-B) 6.38, 6.26, 6.16 (each m, each 1H, Cp-H), 3.29 (m, 4H, -H), 2.90 (m, 2H, Cp-H), 2.07 (m, 2H, 2-H), 1.89 (m, 4H, -H), 1.83 (m, 2H, 3-H), 1.17 (s, 6H, 5-/5’-H).

**Lithium (4-cyclopentadienyl-4-methyl-pentanoic acid diethylamide) 10b.** Reaction of 7.92 g (33.6 mmol) of compound **9b** with 3.59 g (33.6) mmol of lithium diisopropylamide carried out as described above gave 7.62 g (94%) of the compound **10b** as a brown powder. H (benzene-*d*6/tetrahydrofuran-*d*8(1:2), 298 K, 300.14 MHz) 5.73, 5.68 (each m, each 2H, Cp-H), 2.97 (m, 4H, NCH2CH3), 2.22, 1.66 (each m, each 2H, 3-H, 2-H), 1.25 (m, 6H, 5-/5’-H), 1.26 (m, 6H, NCH2CH3).C (benzene-*d*6/tetrahydrofuran-*d*8(1:2), 298 K, 75.7 MHz) 176.3 (C, C-1), 126.3 (C, Cp), 102.2, 100.9 (each CH, Cp), 42.5, 41.8 (each CH2, NCH2CH3), 40.4, 29.5 (each CH2, C-3, C-2), 35.5 (C, C-4), 30.7 (CH3, C-5/-5’), 14.1, 12.7 (each CH3, NCH2CH3).

**Lithium (4-cyclopentadienyl-4-methyl-pentanoic acid tetramethyleneamide) 10c.** Reaction of 4.06 g (16.9 mmol) of compound **9c** with 1.81 g (16.9) mmol of lithium diisopropylamide carried out as described above gave 3.59 g (89%) of the compound **10c** as a brown powder. H (benzene-*d*6/tetrahydrofuran-*d*8(1:2), 298 K, 200.13 MHz) 5.63, 5.57 (each m, each 2H, Cp-H), 3.01 (m, 4H, -H), 2.14, 1.65 (each m, each 2H, 3-H, 2-H), 1.49 (m, 4H, -H), 1.28 (s, 6H, 5-/5’-H). C (benzene-*d*6/tetrahydrofuran-*d*8(1:2), 298 K, 50.3 MHz) 175.1 (C, C-1), 126.8 (C, Cp), 102.4, 100.9 (each CH, Cp), 46.6, 45.9 (each CH2, C-), 41.4, 31.2 (each CH2, C-3, C-2), 35.1 (C, C-4), 30.5 (CH3, C-5/-5’), 26.1, 24.4 (each CH2, C-).

4-1-(Dichlorotitanocenyl)-4-methylpentanoic acid diethylamide 12b. Reaction of 450 mg (1.90 mmol) of compound 10b with 408 mg (1.90 mmol) of mono(5-cyclopentadienyl)titanium trichloride carried out as described above gave 473 mg (61%) of the compound 12b as a red powder, mp 63 °C (Found: C, 57.25; H, 7.04; N, 3.12%. C20H29Cl2NOTi requires C, 57.43; H, 6.99; N, 3.35%). HRMS: calculated for C20H29Cl2NOTi(–HCl)+, 382.142; found 382.142. / cm-1 (KBr) 3108, 2964, 2928, 2874, 1628, 1490, 1459, 1369, 1267, 1026 and 827. H (dichloromethane-*d*2, 298 K, 600 MHz) 6.62, 6.51 (each m, each 2H, Cp-H), 6.56 (s, 5H, Cp’-H), 3.28, 3.18 (each br, each 2H, NCH2CH3), 2.02 (m, 2H, 2-H), 1.78 (m, 2H, 3-H), 1.35 (s, 6H, 5-/5’-H), 1.07 (br, 6H, NCH2CH3). H (dichloromethane-*d*2, 298 K, 150.8 MHz) 172.4 (C, C-1), 148.2 (C, Cp), 120.7 (CH, Cp’), 119.7, 119.1 (each CH, Cp), 42.5, 40.7 (each CH2, NCH2CH3), 41.9 (CH2, C-3), 37.2 (C, C-4), 26.8 (CH2, C-2), 26.7 (CH3, C-5/-5’), 14.4, 13.1 (each CH3, NCH2CH3).

**4-1-(Dichlorotitanocenyl)-4-methylpentanoic acid tetramethyleneamide 12c.** Reaction of 834 mg (3.50 mmol) of compound **10c** with 765 mg (3.50 mmol) of mono(5-cyclopentadienyl)titanium trichloride carried out as described above gave 799 mg (55%) of the compound **12c** as a red powder, mp 71 °C. HRMS: calculated for C20H27Cl2NOTi(–HCl)+, 380.123; found 380.126. / cm-1 (KBr) 3103, 2968, 2931, 2870, 1623, 1452, 1348, 1262, 1024, 822 and 675. H (dichloromethane-*d*2, 298 K, 600 MHz) 6.62, 6.50 (each m, each 2H, Cp-H), 6.56 (s, 5H, Cp’-H), 3.33 (br, 4H, -H), 2.01 (m, 2H, 2-H), 1.87 (br, 4H, -H), 1.82 (m, 2H, 3-H), 1.35 (s, 6H, 5-/5’-H). H (dichloromethane-*d*2, 298 K, 150.8 MHz) 171.9 (C, C-1), 148.1 (C, Cp), 120.7 (CH, Cp’), 119.7, 119.1 (each CH, Cp), 47.1, 46.4 (each (br), each CH2, C-), 41.5 (CH2, C-3), 37.2 (C, C-4), 30.0 (CH2, C-2), 26.8 (CH3, C-5/-5’), 24.7 (CH2, C-).
